# Supplementary material for: Age-dependent postoperative cognitive impairment and Alzheimer-related neuropathology in mice
Source: PubMed Central journal article supplement (PMC3895908; doi:10.1038/srep03766), 2014-01-20
Supplement: srep03766-s1.pdf [file srep03766-s1.pdf]

## Supplementary Materials for

### **Age-dependent postoperative cognitive impairment and Alzheimer-related neuropathology in mice**

Zhipeng Xu <sup>1,#</sup>, Yuanlin Dong <sup>1,#</sup>, Hui Wang <sup>1,2</sup>, Deborah J. Culley <sup>3</sup>, Edward R. Marcantonio, <sup>4</sup>,  
Gregory Crosby <sup>3</sup>, Rudolph E. Tanzi <sup>5</sup>, Yiyang Zhang <sup>1</sup> and Zhongcong Xie <sup>1\*</sup>

\*To whom correspondence should be addressed. E-mail: [zxie@mgh.harvard.edu](mailto:zxie@mgh.harvard.edu)

#### **This file includes:**

Supplementary Figure1 and Figure 2

Supplementary Figures

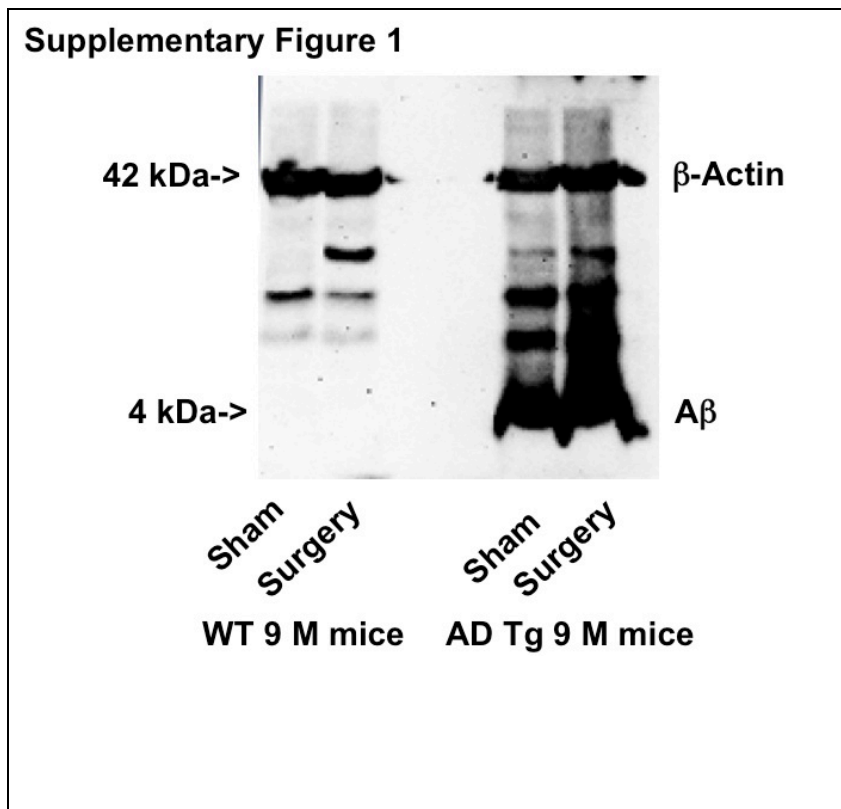

**Supplementary Figure 1.** The baseline A $\beta$  levels in the hippocampus of the 9 month-old AD Tg mice are higher than those in 9 month-old WT mice, and the peripheral surgery increases the hippocampus A $\beta$  levels in the 9 month-old AD Tg mice but not in the 9 month-old WT mice.

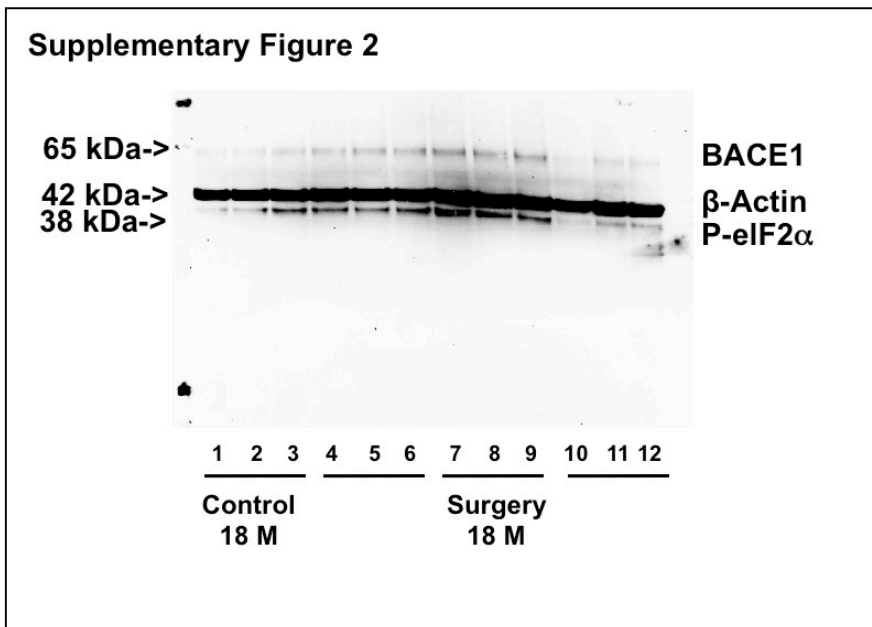

**Supplementary Figure 2.** Peripheral surgery (bands 7 to 9) increases BACE1 and P-eIF2 $\alpha$  levels in the hippocampus of 18 month-old mice at 12 hours post-surgery as compared to the control condition (bands 1 to 3).
